# Supplementary material for: Second-harmonic generation (SHG) and photoluminescence properties of noncentrosymmetric (NCS) layered perovskite solid solutions, CsBi1−xEuxNb2O7 (x = 0, 0.1, and 0.2)
Source: Royal Society of Chemistry journal article supplement (doi:10.1039/c5tc00328h), 2015-01-01

Electronic Supplementary Information (ESI) for:

Second-harmonic generation (SHG) and photoluminescence properties of  
noncentrosymmetric (NCS) layered perovskite solid-solutions,  $\text{CsBi}_{1-x}\text{Eu}_x\text{Nb}_2\text{O}_7$   
( $x = 0, 0.1, \text{ and } 0.2$ )

Hyung Gu Kim,<sup>a</sup> Jae Soo Yoo,<sup>b</sup> and Kang Min Ok<sup>a,\*</sup>

<sup>a</sup>Department of Chemistry, Chung-Ang University, Seoul, 156-756, Republic of Korea

<sup>b</sup>School of Chemical Engineering and Materials Science, Chung-Ang University, Seoul, 156-756, Republic of Korea.

\*Corresponding Author:

Professor Kang Min Ok

*Fax:* +82-2-825-4736; *Tel:* +82-2-820-5197; *E-mail:* [kmok@cau.ac.kr](mailto:kmok@cau.ac.kr)

S1. Final Rietveld plot of  $\text{CsBiNb}_2\text{O}_7$

S2. Final Rietveld plot of  $\text{CsBi}_{0.9}\text{Eu}_{0.1}\text{Nb}_2\text{O}_7$

S3. Final Rietveld plot of  $\text{CsBi}_{0.8}\text{Eu}_{0.2}\text{Nb}_2\text{O}_7$

S4. Atomic Coordinates, Displacement Parameters, and Occupancies for  $\text{CsBiNb}_2\text{O}_7$

S5. Atomic Coordinates, Displacement Parameters, and Occupancies for  $\text{CsBi}_{0.9}\text{Eu}_{0.1}\text{Nb}_2\text{O}_7$

S6. Atomic Coordinates, Displacement Parameters, and Occupancies for  $\text{CsBi}_{0.8}\text{Eu}_{0.2}\text{Nb}_2\text{O}_7$

S7. IR spectra for  $\text{CsBi}_{1-x}\text{Eu}_x\text{Nb}_2\text{O}_7$  ( $x = 0, 0.1, 0.2$ ) solid solutions

S8. UV-Vis diffuse reflectance spectra for  $\text{CsBi}_{1-x}\text{Eu}_x\text{Nb}_2\text{O}_7$  ( $x = 0, 0.1, 0.2$ ) solid solutions

S9. EDX spectra for  $\text{CsBi}_{1-x}\text{Eu}_x\text{Nb}_2\text{O}_7$  ( $x = 0, 0.1, 0.2$ ) solid solutions

S1. Final Rietveld plot of  $\text{CsBiNb}_2\text{O}_7$

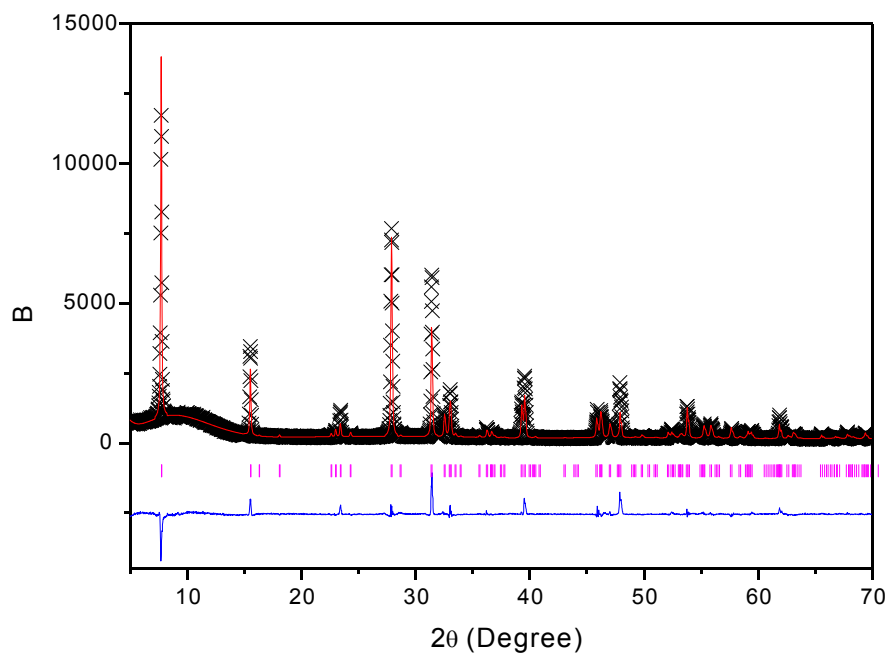

S2. Final Rietveld plot of  $\text{CsBi}_{0.9}\text{Eu}_{0.1}\text{Nb}_2\text{O}_7$

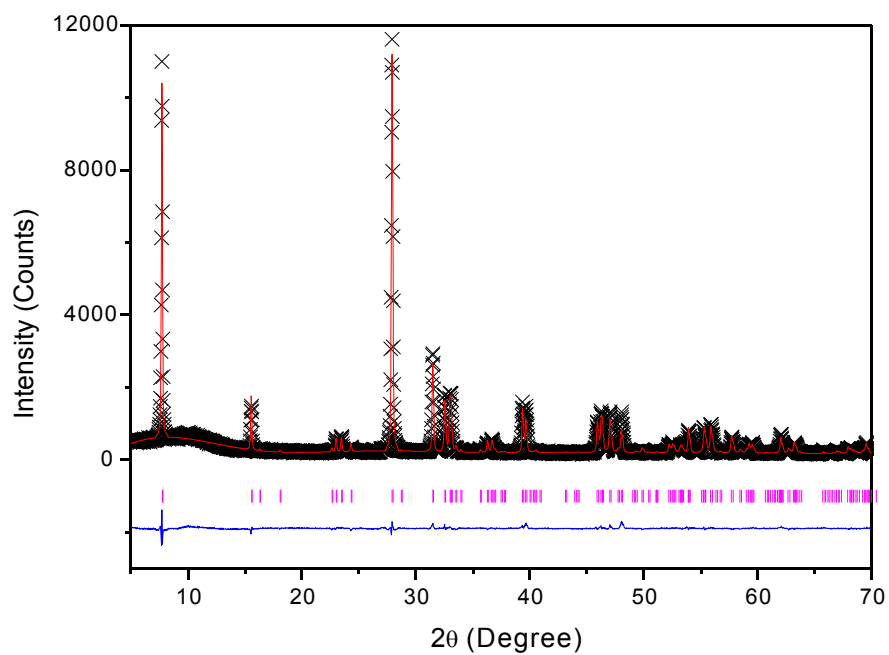

The calculated pattern (red solid line) is compared with observed data ( $\times$ ). The locations of reflections are indicated by the magenta vertical bars. The difference between the observed and calculated profiles is shown at the bottom (blue solid line).

S3. Final Rietveld plot of  $\text{CsBi}_{0.8}\text{Eu}_{0.2}\text{Nb}_2\text{O}_7$

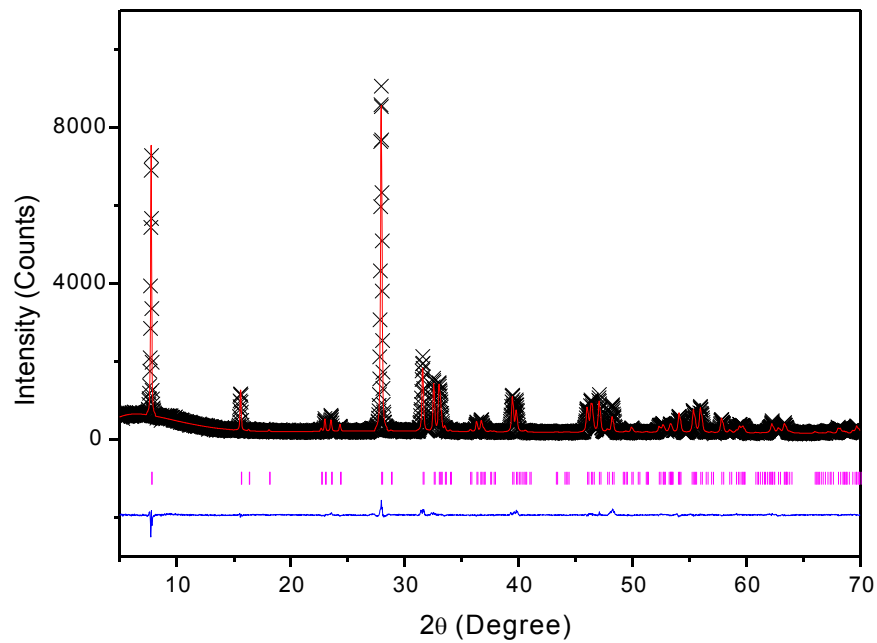

The calculated pattern (red solid line) is compared with observed data (×). The locations of reflections are indicated by the magenta vertical bars. The difference between the observed and calculated profiles is shown at the bottom (blue solid line).

S4. Atomic Coordinates, Displacement Parameters, and Occupancies for CsBiNb<sub>2</sub>O<sub>7</sub>

| <i>Atom</i> | <i>x</i>   | <i>y</i>   | <i>z</i>   | <i>U<sub>iso</sub></i> | <i>Occupancy</i> |
|-------------|------------|------------|------------|------------------------|------------------|
| Cs(1)       | 0.755(5)   | 0.743(3)   | 0.5        | 0.018(2)               | 1.0              |
| Bi(1)       | 0.8036(12) | 0.7210(16) | 0.0        | 0.009(2)               | 1.0              |
| Nb(1)       | 0.2444(16) | 0.757(3)   | 0.2101(3)  | 0.010(2)               | 1.0              |
| O(1)        | 0.720(3)   | 0.339(16)  | 0.0        | 0.015(2) <sup>a</sup>  | 1.0              |
| O(2)        | 0.240(3)   | 0.778(16)  | 0.3798(19) | 0.015(2) <sup>a</sup>  | 1.0              |
| O(3)        | 0.019(3)   | 0.071(14)  | 0.180(2)   | 0.015(2) <sup>a</sup>  | 1.0              |
| O(4)        | 0.430(3)   | 0.434(13)  | 0.192(2)   | 0.015(2) <sup>a</sup>  | 1.0              |

<sup>a</sup>Displacement parameters constrained to be equal.

S5. Atomic Coordinates, Displacement Parameters, and Occupancies for CsBi<sub>0.9</sub>Eu<sub>0.1</sub>Nb<sub>2</sub>O<sub>7</sub>

| <i>Atom</i> | <i>x</i>   | <i>y</i>   | <i>z</i>   | <i>U<sub>iso</sub></i> | <i>Occupancy</i>     |
|-------------|------------|------------|------------|------------------------|----------------------|
| Cs(1)       | 0.7549(13) | 0.7403(16) | 0.5        | 0.0318(15)             | 1.0                  |
| Bi(1)/Eu(1) | 0.8008(9)  | 0.7240(9)  | 0.0        | 0.0223(9)              | 0.9/0.1 <sup>a</sup> |
| Nb(1)       | 0.2454(11) | 0.7548(15) | 0.2082(2)  | 0.0125(12)             | 1.0                  |
| O(1)        | 0.721(8)   | 0.298(10)  | 0.0        | 0.015(2) <sup>b</sup>  | 1.0                  |
| O(2)        | 0.242(6)   | 0.774(9)   | 0.3603(13) | 0.015(2) <sup>b</sup>  | 1.0                  |
| O(3)        | 0.019(11)  | 0.039(8)   | 0.1676(15) | 0.015(2) <sup>b</sup>  | 1.0                  |
| O(4)        | 0.419(7)   | 0.452(7)   | 0.1907(15) | 0.015(2) <sup>b</sup>  | 1.0                  |

<sup>a</sup>Statistically disordered with 90% Bi<sup>3+</sup> and 10% Eu<sup>3+</sup>. Atomic coordinates constrained to be equal.

<sup>b</sup>Displacement parameters constrained to be equal.

S6. Atomic Coordinates, Displacement Parameters, and Occupancies for CsBi<sub>0.8</sub>Eu<sub>0.2</sub>Nb<sub>2</sub>O<sub>7</sub>

| <i>Atom</i> | <i>x</i>   | <i>y</i>   | <i>z</i>   | <i>U<sub>iso</sub></i> | <i>Occupancy</i>     |
|-------------|------------|------------|------------|------------------------|----------------------|
| Cs(1)       | 0.7577(13) | 0.7407(17) | 0.5        | 0.0109(15)             | 1.0                  |
| Bi(1)/Eu(1) | 0.8048(10) | 0.7244(10) | 0.0        | 0.0084(9)              | 0.8/0.2 <sup>a</sup> |
| Nb(1)       | 0.2492(13) | 0.7551(17) | 0.2083(3)  | 0.0125(14)             | 1.0 <sup>a</sup>     |
| O(1)        | 0.710(9)   | 0.313(10)  | 0.0        | 0.015(2) <sup>b</sup>  | 1.0                  |
| O(2)        | 0.242(7)   | 0.777(9)   | 0.3647(15) | 0.015(2) <sup>b</sup>  | 1.0                  |
| O(3)        | 0.024(13)  | 0.033(10)  | 0.1693(17) | 0.015(2) <sup>b</sup>  | 1.0                  |
| O(4)        | 0.409(7)   | 0.462(7)   | 0.1917(18) | 0.015(2) <sup>b</sup>  | 1.0                  |

<sup>a</sup>Statistically disordered with 80% Bi<sup>3+</sup> and 20% Eu<sup>3+</sup>. Atomic coordinates constrained to be equal.

<sup>b</sup>Displacement parameters constrained to be equal.

S7. IR spectra for  $\text{CsBi}_{1-x}\text{Eu}_x\text{Nb}_2\text{O}_7$  ( $x = 0, 0.1, 0.2$ ) solid solutions

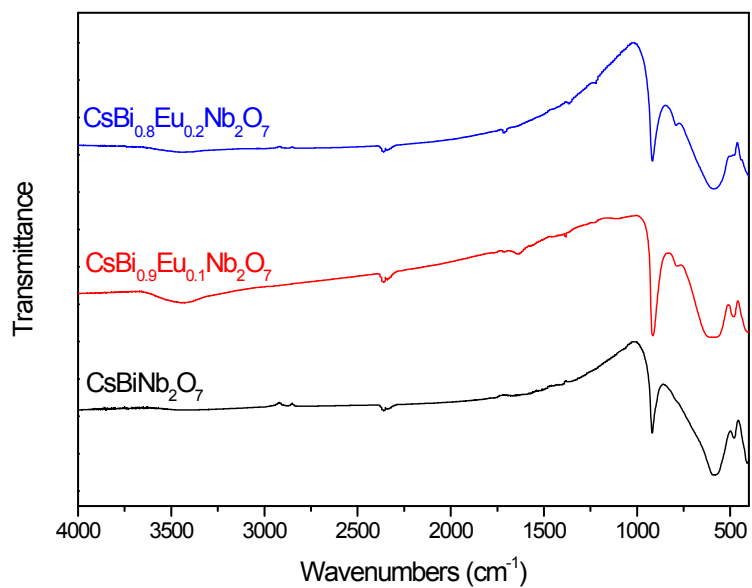

S8. UV-Vis diffuse reflectance spectra for  $\text{CsBi}_{1-x}\text{Eu}_x\text{Nb}_2\text{O}_7$  ( $x = 0, 0.1, 0.2$ ) solid solutions

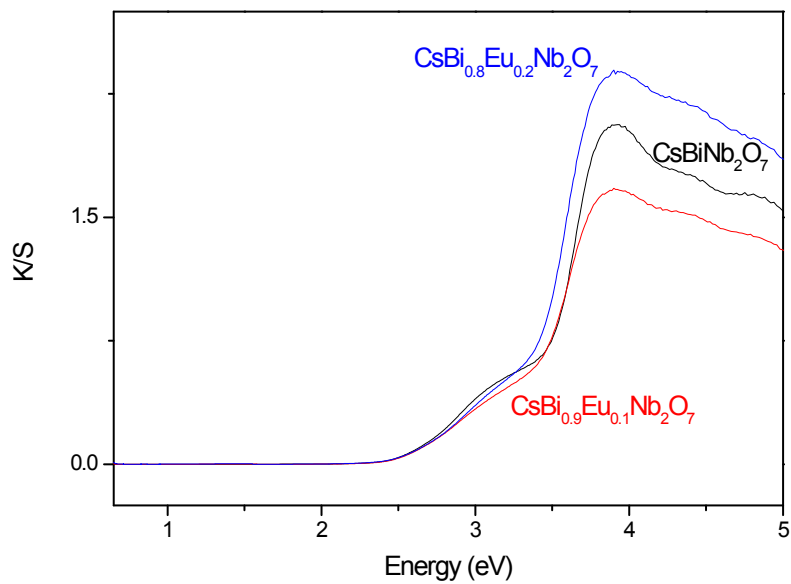

S9. EDX spectra for  $\text{CsBi}_{1-x}\text{Eu}_x\text{Nb}_2\text{O}_7$  ( $x = 0, 0.1, 0.2$ ) solid solutions

(1)  $\text{CsBiNb}_2\text{O}_7$

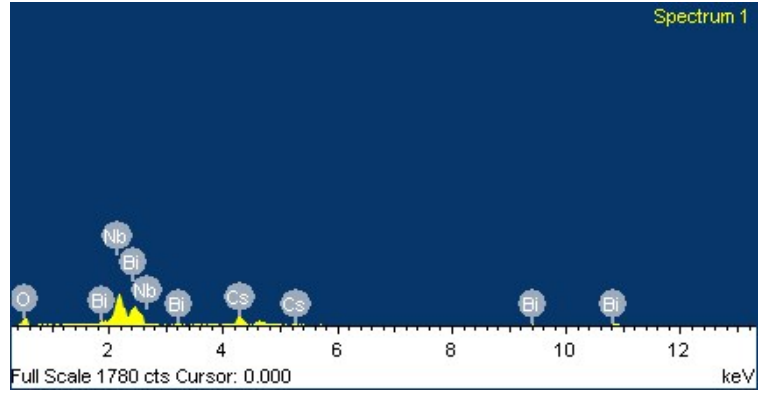

(2)  $\text{CsBi}_{0.9}\text{Eu}_{0.1}\text{Nb}_2\text{O}_7$

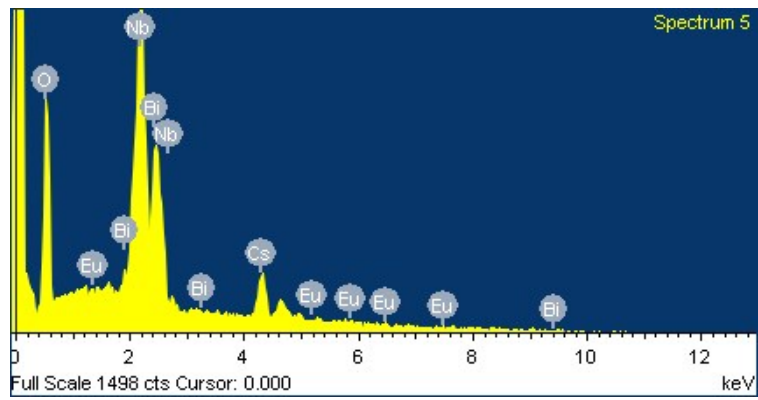

(3)  $\text{CsBi}_{0.8}\text{Eu}_{0.2}\text{Nb}_2\text{O}_7$

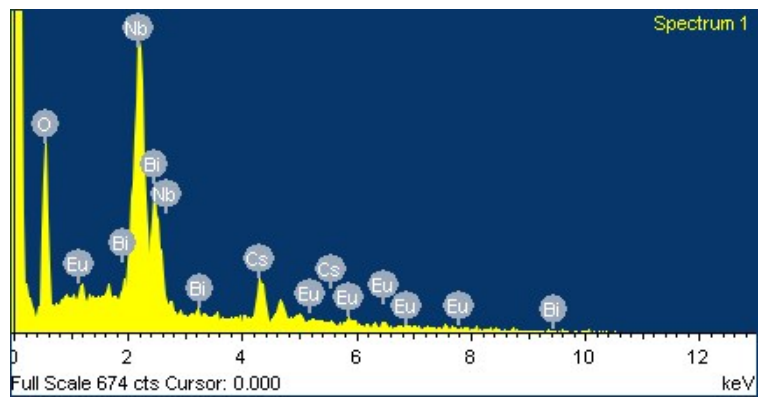

Supplement: c5tc00328h1.pdf [file c5tc00328h1.pdf]
